# Supplementary material for: Targeting of Janus Kinases Limits Pro-Inflammatory but Also Immunosuppressive Circuits in the Crosstalk between Synovial Fibroblasts and Lymphocytes
Source: MDPI journal article supplement (doi:10.3390/biomedicines9101413), 2021-10-08
Supplement: s1 [file s1]

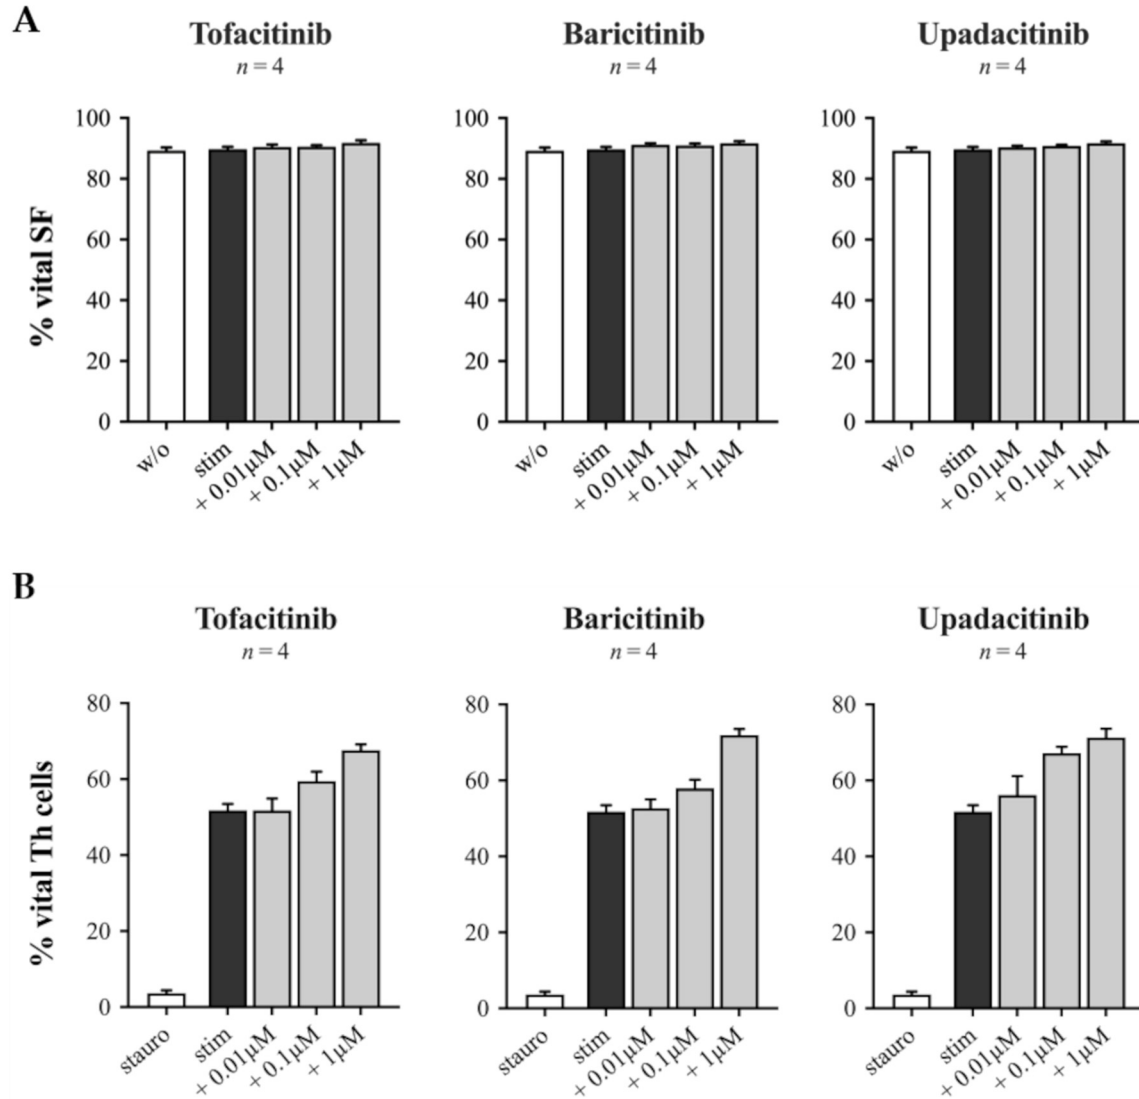

**Figure S1:** Viability of SF and Th cells treated with JAKi. **(A)** SF were stimulated with ThCM in the presence or absence of different concentrations of tofacitinib, baricitinib or upadacitinib. After 5 days of culture, cells were harvested, stained with Annexin V and propidium iodide and cell viability was determined by flow cytometry. **(B)** Th cells were stimulated with anti-CD3 and anti-CD28 antibodies and treated with different concentrations of JAKi as indicated. On day 6, Th cells were harvested and stained with Annexin V and propidium iodide. Treatment of Th cells with 2µM staurosporin (stauro) within the last 24 hours of culture served as a positive control for cell apoptosis. Data are shown as mean + SEM.

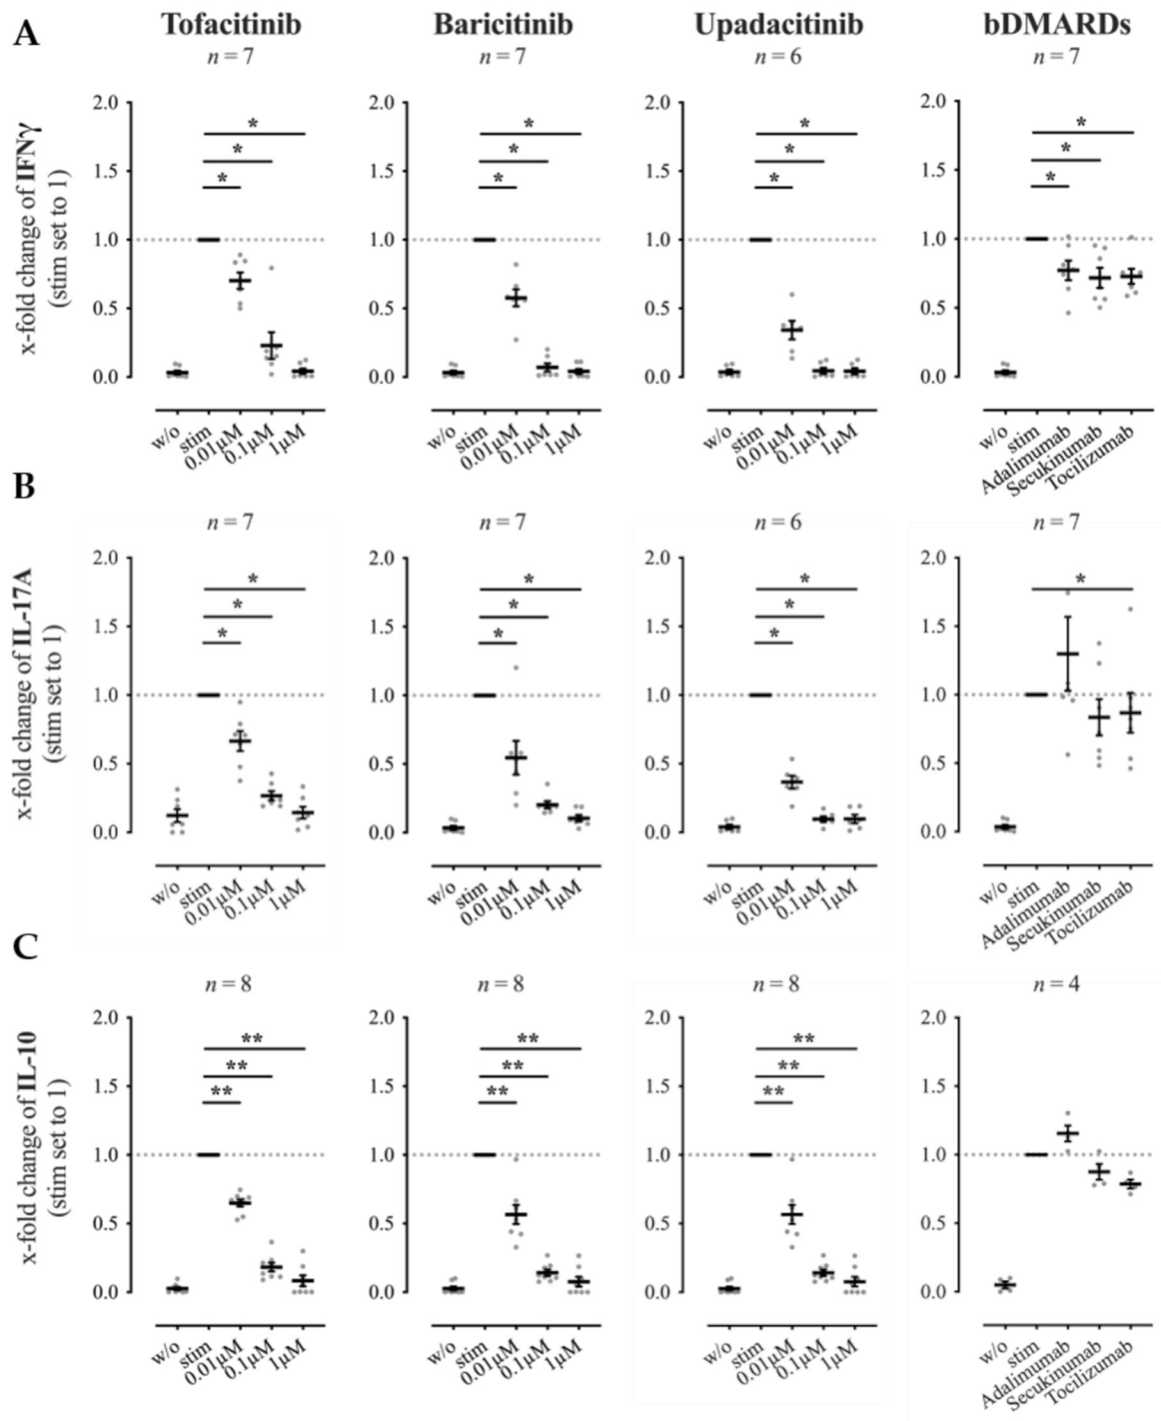

**Figure S2.** Effects of tofacitinib, baricitinib, upadacitinib and bDMARDs on IFN $\gamma$  (A), IL-17A (B) and IL-10 (C) expression by Th cells in mono-culture. Th cells were cultured with or without stimulation by anti-CD3/ anti-CD28 antibodies and treated with drugs as indicated. Supernatants were harvested on day 6 and cytokine concentrations were quantified by ELISA. Results are presented as x-fold change with stimulated Th cells set to 1 (mean concentrations  $\pm$  SEM in pg/ml: IFN $\gamma$ :  $18068.31 \pm 2731.63$ ; IL-17A:  $3033.54 \pm 915.55$ ; IL-10:  $5194.79 \pm 1416.66$ ). bDMARDs shown were used at a concentration of 100  $\mu$ g/mL. Data shown as mean  $\pm$  SEM, significance tested using Wilcoxon signed-rank test,  $p^{**} = <0.01$ ,  $p^{*} = <0.05$ .

**A**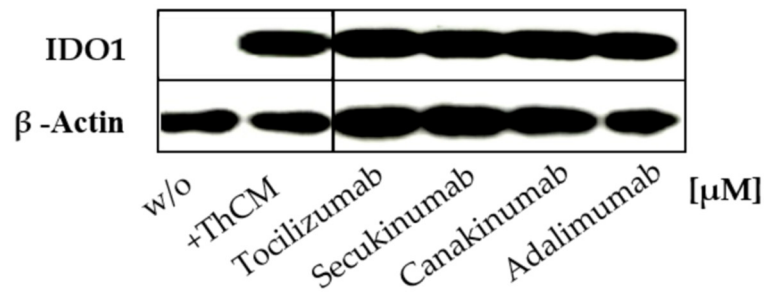**B**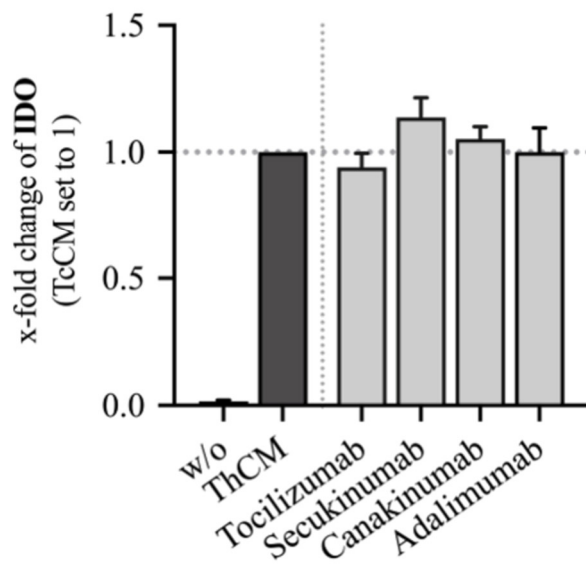

**Figure S3.** Effects of tocilizumab, secukinumab, canakinumab or adalimumab on the expression of IDO1 by SF stimulated with ThCM. SF were left untreated (w/o) or stimulated with ThCM and treated with tocilizumab ( $n = 7$ ), secukinumab ( $n = 12$ ), canakinumab ( $n = 7$ ) or adalimumab ( $n = 7$ ). On day 4, SF were harvested and whole cell extracts were subjected to western blot analysis. Shown are the results from one representative experiment (A) and the x-fold change of IDO1 relative to  $\beta$ -actin expression with SF stimulated with ThCM set as 1 detected in all experiments (B). Data shown as mean + SEM, significance tested using Wilcoxon signed-rank test.
